# Supplementary material
Source: PubMed Central journal article supplement (PMC7079948)
Supplement: 251_2016_940_MOESM2_ESM.pdf [file 251_2016_940_MOESM2_ESM.pdf]

## **Supplemental material, tables S1 and S2a-c**

### **Adaptive evolution of virus-sensing toll-like receptor 8 in bats**

Julia Schad<sup>1</sup> and Christian C. Voigt

<sup>1</sup>Author for Correspondence: Julia Schad, Department of Evolutionary Ecology, Leibniz Institute for Zoo and Wildlife Research, Berlin, Germany, telephone +49 30 5168 526, fax +49 30 5126-104, [schad@izw-berlin.de](mailto:schad@izw-berlin.de)

**Table S1. Investigated bat species, sample accession numbers due to the IZW biobank and geographic origin.**

| <b>Accession Nr</b> | <b>Species</b>                    | <b>Origin</b> |
|---------------------|-----------------------------------|---------------|
| IZW-CCV-E250/13     | <i>Nyctalus noctula</i>           | Germany       |
| IZW-CCV-2011/13     | <i>Nyctalus leisleri</i>          | Germany       |
| IZW-CCV-E263/13     | <i>Pipistrellus nathusii</i>      | Germany       |
| XM_008156576        | <i>Eptesicus serotinus</i>        | unknown       |
| IZW-CCV-E251/13     | <i>Vespertillius murinus</i>      | Germany       |
| IZW-CCV-E260/13     | <i>Myotis myotis</i>              | Bulgaria      |
| XM_006763795        | <i>Myotis davidii</i>             | unknown       |
| XM_005880947        | <i>Myotis brandtii</i>            | unknown       |
| XM_006088606        | <i>Myotis lucifugus</i>           | Canada        |
| IZW-CCV-VP#1        | <i>Vampyressa pusilla</i>         | Costa Rica    |
| IZW-CCV-VB#1        | <i>Vampyressa bidens</i>          | Costa Rica    |
| IZW-CCV-CP-SP1      | <i>Carollia perspicillata</i>     | Costa Rica    |
| IZW-CCV-PP#46       | <i>Pteronotus parnelli</i>        | Costa Rica    |
| IZW-CCV-NL#2        | <i>Noctilio leporinus</i>         | Panama        |
| IZW-CCV-NA-SP1      | <i>Noctilio albiventris</i>       | Panama        |
| IZW-CCV-E31/14      | <i>Rhinolophus ferrumequinuum</i> | Bulgaria      |
| IZW-CCV-Reu17/13    | <i>Rhinolophus euryale</i>        | Bulgaria      |
| IZW-CCV-E200/13     | <i>Rhinolophus hipposiderus</i>   | Bulgaria      |
| XM_006906028        | <i>Pteropus alecto</i>            | unknown       |
| IZW-CCV-66-08       | <i>Eidolon helvum</i>             | unknown       |

**Table S2. Designed primers to amplify the chiropteran TLR8 gene.**

| Position <sup>a</sup> | Primer <sup>b</sup> | Direction | Sequence 3'-5'                         | Fragment <sup>c</sup> |
|-----------------------|---------------------|-----------|----------------------------------------|-----------------------|
| 1                     | F1long              | forward   | ACATGACCCCTTCMGTCTTTRCTGCTGACCTGC      | 1                     |
| 1                     | PtF1a               | forward   | ACATGACCCCTTCAGTCTTTACTTCTG            | 1                     |
| 8                     | Myof1a              | forward   | CCTTCCGTCTTTGCTGCTGACCTGC              | 1                     |
| 21                    | F1Rhi               | forward   | TTGCTGACCTGCCTTGTCTCTG                 | 1                     |
| 22                    | F1                  | forward   | TKCTGACCTGCCTTKTCCTGCT                 | 1                     |
| 35                    | PtF1b               | forward   | TTTCCTGCTAATCTCTGATTCCTGTG             | 1                     |
| 35                    | MyoF1b              | forward   | TGTCCTGCTAACCTCRGATTCCTGTG             | 1                     |
| 516                   | R1a                 | revers    | AGCAGTTCCAGCCCARATTGAG                 | 1                     |
| 514                   | F2aRhi              | forward   | CTCTCTATTTGGGCTGGAAGT                  | 2                     |
| 515                   | F2a                 | forward   | TCTCAATTTGGGCTGGAAGTGC                 | 2                     |
| 517                   | F2                  | forward   | TCWATTTGRGCTGGAAGTGC                   | 2                     |
| 666                   | R1aRhi              | revers    | GTGTTGCTGAGATACAAGTTTGTGAG             | 1                     |
| 756                   | R1                  | revers    | AARCACCTYGGACAGTTCCCGCT                | 1                     |
| 761                   | R1b                 | revers    | GTTGAARCAACKTGGACAGTTC                 | 1                     |
| 776                   | R1bRhi              | revers    | CCTCCTGGACAAGGTGTACAG                  | 1                     |
| 872                   | R1c                 | revers    | TGGAGGGAAGTGCTRGAGAGGTTG               | 1                     |
| 1110                  | F3                  | forward   | TTGCAYTTAARRGGTTATGTGTTCCAG            | 3                     |
| 1110                  | F3Rhi               | forward   | TTGCACTTAGAAGGTTATGTGTTCCAG            | 3                     |
| 1110                  | F3Vesp              | forward   | TTGCATTTAAGAGGTTATGTGTTCCAG            | 3                     |
| 1076                  | F3Vamp              | forward   | CCAAAACCTTCTCTAATCTTACATCTC            | 3                     |
| 1187                  | R2Rhi               | revers    | AAGTTAACACCCAAGTTGATAGTC               | 2                     |
| 1187                  | R2Nyc               | revers    | AATAAAGTTAACGCCCAAGTTGATAGT            | 2                     |
| 1187                  | R2Car               | revers    | AATGAAGTTCACGCCCAAGTCGATAGT            | 2                     |
| 1192                  | R2                  | revers    | AATAAARTTAAYVCCCAAGTTGA                | 2                     |
| 1196                  | R2Noc               | revers    | TTTGCTTAATGAAGTTCACGCCCAAG             | 2                     |
| 1551                  | F4Rhi               | forward   | CAAGCATTAAATGGAAGTGAATTTTCAG           | 4                     |
| 1662                  | F4Noc               | forward   | TTTGCTTAATGAAGTTCACGCCCAAG             | 4                     |
| 1692                  | F4                  | forward   | CACTATTTTCMRAATMGCAGGGGT               | 4                     |
| 1818                  | R3                  | revers    | CCACTRAAACTAATTSTTYCAGGGA              | 3                     |
| 1838                  | R3Rhi               | revers    | AATTGATCAAGGCAGTTGCCACT                | 3                     |
| 2307                  | F5                  | forward   | AACCCYTTWGAMTGYACCTGTGAC               | 5                     |
| 2307                  | F5Rhi               | forward   | AACCCTTTTGACTGTACTTGTGAC               | 5                     |
| 2426                  | R4                  | revers    | AGCTCYAGAGTCAYAATRCTCTTC               | 4                     |
| 2448                  | R4aRhi              | revers    | GGTGTCTGAAACACAGGTGGTTAG               | 4                     |
| 2458                  | R4a                 | revers    | GGCYGCAATGGTGTCTGAAACAC                | 4                     |
| 2781                  | F5en                | forward   | GATAACCTCATGCAGAGCATCAAC               | 5                     |
| 2992                  | R5vo                | revers    | TGGGRTTGTGAGGCCAYTGGAGGATGG            | 5                     |
| 3092                  | R5long              | revers    | CRTCAGTTAGTATTGCTTAATGGAGTCAACAT<br>AC | 5                     |
| 3102                  | R5                  | revers    | RTCAGTTAGTATTGYYTAATGGA                | 5                     |
| 3103                  | R5short             | revers    | CRTCAGTTAGTATTGCTTAATG                 | 5                     |

<sup>a</sup> nucleotide position according to the nucleotide sequence of *Eidolon helvum*, starting point is the 3' end of forward primers and the 5' end of revers primers

<sup>b</sup> forward and revers primers were used in different combinations, overspanning different fragment-lengths in different bat species

<sup>c</sup> according to sequencing analyses

**Table S3a.** Nucleotide/amino acid sequence percent identities of the whole TLR8 sequences between investigated bat taxa<sup>§</sup> and between the equine and human orthologous.

|                       | Vespertilioninae | Myotinae | Phyllostomidae | Mormoopidae | Noctilionidae | Emballonuridae | Rhinolophidae | Pteropidae | <i>Equus caballus</i> |
|-----------------------|------------------|----------|----------------|-------------|---------------|----------------|---------------|------------|-----------------------|
| Vespertilioninae      | 96/94            |          |                |             |               |                |               |            |                       |
| Myotinae              | 89/87            | 97/95    |                |             |               |                |               |            |                       |
| Phyllostomidae        | 83/79            | 82/79    | 96/96          |             |               |                |               |            |                       |
| Mormoopidae           | 83/79            | 82/79    | 91/89          |             |               |                |               |            |                       |
| Noctilionidae         | 81/77            | 81/77    | 88/87          | 88/86       | 99/99         |                |               |            |                       |
| Emballonuridae        | 82/77            | 81/78    | 86/81          | 86/81       | 85/79         |                |               |            |                       |
| Rhinolophidae         | 79/73            | 70/73    | 81/73          | 82/75       | 80/72         | 82/75          | 98/98         |            |                       |
| Pteropidae            | 80/75            | 79/76    | 84/76          | 85/76       | 81/74         | 87/76          | 84/75         | 99/99      |                       |
| <i>Equus caballus</i> | 80/74            | 79/74    | 83/75          | 83/75       | 81/75         | 83/76          | 85/75         | 84/76      |                       |
| <i>Homo sapiens</i>   | 77/70            | 76/70    | 80/72          | 80/72       | 78/71         | 79/71          | 80/70         | 81/72      | 84/77                 |

<sup>§</sup> Vespertilioninae *Noctula noctula*, *N.leisleri*, *Pipistrellus. nathusi*, *Vespertilio murinus*, *Eptesicus fuscus*; Myotinae: *Myotis myotis*, *M. davidii*, *M. brandtii*, *M. lucifugus*; Phyllostomidae: *Vampyressa bidens*, *V. pusilla*, *Carollia perspicillata*; Mormopidae: *Pteronotus parnelli*; Noctilionidae: *Noctilio albiventris*, *N. leporinus*; Emballonuridae: *Saccopteryx bilineata*; Rhinolophidae: *Rhinolophus euryale*, *R. ferrumequinnum*, *R. hipposideros*; Pteropidae: *Eidolon helvum*, *Pteropus alecto*; *Equus caballus* (XM\_014728737); *Homo sapiens* (XM\_005274543).

**Table S3b.** Nucleotide/amino acid sequence percent identities of the TLR8 LRR ectodomain between investigated bat taxa<sup>§</sup> and between the equine and human orthologous.

|                       | Vespertilioninae | Myotinae | Phyllostomidae | Mormoopidae | Noctilionidae | Emballourinae | Rhinolophidae | Pteropidae | <i>Equus caballus</i> |
|-----------------------|------------------|----------|----------------|-------------|---------------|---------------|---------------|------------|-----------------------|
| Vespertilioninae      | 95/93            |          |                |             |               |               |               |            |                       |
| Myotinae              | 88/84            | 97/95    |                |             |               |               |               |            |                       |
| Phyllostomidae        | 82/75            | 80/75    | 95/95          |             |               |               |               |            |                       |
| Mormoopidae           | 82/76            | 80/76    | 90/88          |             |               |               |               |            |                       |
| Noctilionidae         | 79/74            | 79/73    | 88/86          | 88/84       | 99/99         |               |               |            |                       |
| Emballouridae         | 82/77            | 79/74    | 85/78          | 85/78       | 83/75         |               |               |            |                       |
| Rhinolophidae         | 76/68            | 75/68    | 79/68          | 80/70       | 77/68         | 80/70         | 99/98         |            |                       |
| Pteropidae            | 77/70            | 76/71    | 81/71          | 81/72       | 79/70         | 81/72         | 84/75         | 99/99      |                       |
| <i>Equus caballus</i> | 78/69            | 76/69    | 81/71          | 81/71       | 79/70         | 81/72         | 85/75         | 82/72      |                       |
| <i>Homo sapiens</i>   | 75/65            | 73/65    | 78/67          | 78/67       | 75/67         | 77/67         | 77/66         | 78/67      | 82/74                 |

<sup>§</sup> Vespertilioninae *Noctula noctula*, *N.leisleri*, *Pipistrellus. nathusi*, *Vespertilio murinus*, *Eptesicus fuscus*; Myotinae: *Myotis myotis*, *M. davidii*, *M. brandtii*, *M. lucifugus*; Phyllostomidae: *Vampyressa bidens*, *V. pusilla*, *Carollia perspicillata*; Mormopidae: *Pteronotus parnelli*; Noctilionidae: *Noctilio albiventris*, *N. leporinus*; Emballourinae: *Saccopteryx bilineata*; Rhinolophidae: *Rhinolophus euryale*, *R. ferrumequinnum*, *R. hipposideros*; Pteropidae: *Eidolon helvum*, *Pteropus alecto*; *Equus caballus* (XM\_014728737); *Homo sapiens* (XM\_005274543).

**Table S3c.** Nucleotide/amino acid sequence percent identities of the TLR8 TM and TIR domain between investigated bat taxa<sup>§</sup> and between the equine and human orthologous.

|                       | Vespertilioninae | Myotinae | Phyllostomidae | Mormoopidae | Noctilionidae | Emballourinae | Rhinolophidae | Pteropidae | <i>Equus caballus</i> |
|-----------------------|------------------|----------|----------------|-------------|---------------|---------------|---------------|------------|-----------------------|
| Vespertilioninae      | 97/98            |          |                |             |               |               |               |            |                       |
| Myotinae              | 94/97            | 98/99    |                |             |               |               |               |            |                       |
| Phyllostomidae        | 89/93            | 89/94    | 96/99          |             |               |               |               |            |                       |
| Mormoopidae           | 91/93            | 90/95    | 94/96          |             |               |               |               |            |                       |
| Noctilionidae         | 90/92            | 89/93    | 91/94          | 92/93       | 99/100        |               |               |            |                       |
| Emballouridae         | 92/94            | 91/95    | 91/95          | 92/95       | 91/93         |               |               |            |                       |
| Rhinolophidae         | 90/94            | 90/94    | 91/94          | 92/93       | 90/92         | 92/94         | 99/99         |            |                       |
| Pteropidae            | 90/95            | 89/94    | 90/95          | 91/93       | 89/92         | 91/95         | 92/94         | 100/100    |                       |
| <i>Equus caballus</i> | 90/94            | 89/95    | 90/94          | 91/93       | 91/93         | 91/93         | 93/92         | 92/92      |                       |
| <i>Homo sapiens</i>   | 88/90            | 86/89    | 89/91          | 89/90       | 88/88         | 89/90         | 90/89         | 90/90      | 92/92                 |

<sup>§</sup> Vespertilioninae *Noctula noctula*, *N.leisleri*, *Pipistrellus. nathusi*, *Vespertilio murinus*, *Eptesicus fuscus*; Myotinae: *Myotis myotis*, *M. davidii*, *M. brandtii*, *M. lucifugus*; Phyllostomidae: *Vampyressa bidens*, *V. pusilla*, *Carollia perspicillata*; Mormopidae: *Pteronotus parnelli*; Noctilionidae: *Noctilio albiventris*, *N. leporinus*; Emballourinae: *Saccopteryx bilineata*; Rhinolophidae: *Rhinolophus euryale*, *R. ferrumequinnum*, *R. hipposideros*; Pteropidae: *Eidolon helvum*, *Pteropus alecto*; *Equus caballus* (XM\_014728737); *Homo sapiens* (XM\_005274543).

**Table S4. Positive selected sites identified by different model analyses for the Chiropteran TLR8 gene in relation to PSS of other taxa and to relevant binding and dimerization sites of the human TLR8 (hTLR8) molecule according to Tanji et al. (2013, 2015).**

| hTLR8 Position <sup>a</sup> | Persistent positive selected sites |      |       |      |       |       | Episodic positive selected sites |                     | Ligand binding sites and dimerization sites in hTLR8 |                 |                 |    | Amino acid alterations in bats | PSS of other taxa <sup>f</sup> |
|-----------------------------|------------------------------------|------|-------|------|-------|-------|----------------------------------|---------------------|------------------------------------------------------|-----------------|-----------------|----|--------------------------------|--------------------------------|
|                             | M8                                 | SLAC | FEL   | REL  | FUBAR | Prime | MEME                             | Branch <sup>b</sup> | Dim <sup>c</sup>                                     | 1. <sup>d</sup> | 2. <sup>e</sup> | aa |                                |                                |
| 15                          |                                    |      | 0.078 |      |       | 0.007 |                                  |                     |                                                      |                 |                 |    |                                |                                |
| 32                          |                                    |      |       |      |       |       | 0.007                            | aY                  |                                                      |                 |                 |    |                                |                                |
| 39                          |                                    |      |       |      |       | 0.018 | 0.010                            | Pt, Sb              |                                                      |                 |                 |    |                                | Mammals                        |
| 41                          |                                    |      |       | 75   |       |       |                                  |                     |                                                      |                 |                 |    |                                |                                |
| 43                          | 0.93                               |      |       | 120  |       | 0.082 |                                  |                     |                                                      |                 |                 |    |                                |                                |
| 61                          |                                    |      |       |      |       | 0.046 | 0.020                            | Pt                  |                                                      |                 |                 |    |                                |                                |
| 62                          |                                    |      | 0.082 |      |       |       |                                  |                     |                                                      |                 |                 |    |                                |                                |
| 77                          |                                    |      | 0.041 | 50   | 0.88  |       | 0.055                            | R, wMy              |                                                      |                 |                 |    |                                |                                |
| 88                          |                                    |      |       |      |       |       | 0.040                            | Sb, Vm              |                                                      |                 |                 |    |                                |                                |
| 91                          |                                    |      |       |      |       | 0.053 |                                  |                     |                                                      |                 |                 |    |                                |                                |
| 104                         | 0.97                               |      |       | 395  | 0.90  | 0.041 |                                  |                     |                                                      |                 |                 |    |                                |                                |
| 108                         | 0.94                               |      |       | 115  |       |       |                                  |                     |                                                      |                 |                 |    |                                |                                |
| 109                         |                                    |      | 0.031 | 100  | 0.94  |       | 0.051                            | R, Ef               |                                                      |                 |                 |    |                                |                                |
| 138                         |                                    |      | 0.080 |      |       | 0.072 |                                  |                     |                                                      |                 |                 |    |                                |                                |
| 146                         |                                    |      |       |      |       |       |                                  |                     |                                                      |                 |                 |    |                                | Mammals                        |
| 150                         | 1.00                               |      |       | 2720 |       |       |                                  |                     |                                                      |                 |                 |    |                                | Bats                           |
| 157                         |                                    |      |       |      |       |       | 0.006                            | Mb                  |                                                      |                 |                 |    |                                |                                |
| 160                         |                                    |      |       |      |       |       |                                  |                     |                                                      |                 |                 |    |                                | Mammals                        |
| 167                         |                                    |      |       |      |       |       | 0.045                            | Vm                  |                                                      |                 |                 |    |                                |                                |
| 174                         |                                    |      |       | 86   | 0.85  |       |                                  |                     |                                                      |                 |                 |    |                                | Mammals                        |
| 178                         |                                    |      |       |      |       |       |                                  |                     |                                                      |                 |                 |    |                                | Suidae                         |
| 186                         |                                    |      |       |      |       |       |                                  |                     |                                                      |                 |                 |    |                                | Mammals                        |
| 191                         |                                    |      |       |      |       |       |                                  |                     |                                                      |                 |                 |    |                                | Mammals                        |
| 192                         |                                    |      |       |      |       | 0.069 |                                  |                     |                                                      |                 |                 |    |                                |                                |
| 195                         |                                    |      |       | 74   | 0.91  |       |                                  |                     |                                                      |                 |                 |    |                                |                                |
| 205                         |                                    |      |       |      |       | 0.090 |                                  |                     |                                                      |                 |                 |    |                                |                                |
| 214                         |                                    |      |       |      |       |       |                                  |                     |                                                      |                 |                 |    |                                | Mammals                        |
| 236                         |                                    |      | 0.013 | 150  | 0.96  |       | 0.023                            | R, Sb               |                                                      |                 |                 |    |                                | <b>Mammals</b>                 |

|             |      |      |       |      |      |       |       |                    |   |   |   |  |     |           |  |  |         |
|-------------|------|------|-------|------|------|-------|-------|--------------------|---|---|---|--|-----|-----------|--|--|---------|
| 238         | 0.96 |      | 0.086 | 592  | 0.90 |       |       |                    |   |   |   |  |     |           |  |  |         |
| 239         |      |      |       | 72   | 0.85 | 0.065 | 0.071 | <i>M.lucifugus</i> |   |   |   |  |     |           |  |  |         |
| 240         | 0.92 |      |       |      |      |       |       |                    |   |   |   |  |     |           |  |  |         |
| 243         |      |      |       |      |      | 0.030 |       |                    |   |   |   |  |     |           |  |  |         |
| 249         |      |      |       |      |      |       |       |                    |   |   |   |  |     |           |  |  | Mammals |
| 261         |      |      |       |      |      |       |       |                    | u | x |   |  | F   | F         |  |  |         |
| 277         | 0.94 | .072 | 0.017 | 443  | 0.97 |       | 0.016 | aY, Sb             |   |   |   |  |     |           |  |  |         |
| 279         |      |      |       |      |      |       | 0.028 | aN, Pt             |   |   |   |  |     |           |  |  |         |
| 280         |      |      |       |      |      | 0.072 |       |                    |   |   |   |  |     |           |  |  |         |
| 285         | 0.94 |      |       | 615  | 0.83 |       |       |                    |   |   |   |  |     |           |  |  |         |
| 290         |      |      | 0.081 |      |      |       |       |                    |   |   |   |  |     |           |  |  |         |
| 291         |      |      |       |      |      |       |       |                    |   |   | x |  | Y   | Y-I       |  |  |         |
| 311         |      |      | 0.043 |      |      |       |       |                    |   |   |   |  |     |           |  |  |         |
| 312         | 0.92 |      |       | 325  |      | 0.082 |       |                    |   |   |   |  |     |           |  |  |         |
| 314         |      |      |       |      |      |       |       |                    |   |   | x |  | K   | K         |  |  |         |
| 315         |      |      |       |      |      |       |       |                    |   |   | x |  | V   | E         |  |  |         |
| 319         |      |      |       |      |      |       |       |                    |   |   | x |  | E   | E-Q       |  |  |         |
| 338         | 0.96 | .070 | 0.004 | 2101 | 0.98 | 0.019 | 0.005 | aY, Pt, R, aN      |   |   |   |  |     |           |  |  | Mammals |
| 340         |      |      |       |      |      |       |       |                    |   |   | x |  | E   | E-K-Q     |  |  |         |
| 341,343,345 |      |      |       |      |      |       |       |                    |   |   | x |  | IDS | IDS       |  |  |         |
| 348         |      |      |       |      |      |       |       |                    | u |   |   |  | Y   | Y         |  |  |         |
| 349         |      |      |       |      |      |       |       |                    |   | x |   |  | I   | I-R-V     |  |  | Mammals |
| 350         |      |      |       |      |      |       |       |                    |   | x |   |  | K   | K-Q       |  |  |         |
| 351         |      |      | 0.046 |      |      |       | 0.043 | aY, R, wMy         |   | x |   |  | G   | G-T-A-K   |  |  |         |
| 352         |      |      | 0.049 |      | 0.91 | 0.008 |       |                    |   | x |   |  | S   | Q-A-E-D-T |  |  |         |
| 353         |      |      |       |      |      |       |       |                    | u | x |   |  | Y   | Y         |  |  |         |
| 354         |      |      | 0.023 | 88   | 0.93 |       | 0.009 | Sb, Vm, Ef         |   |   |   |  |     |           |  |  |         |
| 355         | 0.90 |      |       |      |      |       |       |                    |   |   |   |  |     |           |  |  |         |
| 356         |      |      | 0.053 | 68   | 0.92 |       | 0.007 | R                  |   |   |   |  |     |           |  |  |         |
| 365         |      |      |       |      |      | 0.041 |       |                    |   |   |   |  |     |           |  |  |         |
| 368         | 0.92 |      | 0.10  | 202  | 0.90 |       |       |                    |   |   |   |  |     |           |  |  | Bats    |
| 370         |      |      |       |      |      |       |       |                    |   |   | x |  | R   | R-Q       |  |  |         |
| 373         |      |      |       |      |      |       |       |                    |   |   | x |  | H   | H-P       |  |  |         |
| 375         |      |      |       |      |      |       |       |                    |   |   | x |  | R   | R-K-E     |  |  |         |
| 378         |      |      |       |      |      |       |       |                    | u | x |   |  | V   | V         |  |  |         |



|          |      |  |       |     |      |       |       |            |   |   |   |  |           |  |                  |  |                   |
|----------|------|--|-------|-----|------|-------|-------|------------|---|---|---|--|-----------|--|------------------|--|-------------------|
| 385      |      |  | 0.079 | 57  | 0.89 |       |       |            |   |   |   |  |           |  |                  |  |                   |
| 386      |      |  |       |     |      |       | 0.006 | Rhip       |   |   |   |  |           |  |                  |  |                   |
| 388      |      |  |       |     |      |       |       |            |   |   |   |  |           |  |                  |  | Suidae<br>Mammals |
| 395      |      |  |       |     |      | 0.025 |       |            |   |   |   |  |           |  |                  |  |                   |
| 397      |      |  |       |     |      |       | 0.002 | Pt, Vm, Mb |   |   |   |  |           |  |                  |  |                   |
| 398      |      |  |       |     |      |       |       |            |   |   | x |  | <b>T</b>  |  | <b>T</b>         |  |                   |
| 400      |      |  |       |     |      |       |       |            |   |   | x |  | <b>N</b>  |  | <b>N-D</b>       |  |                   |
| 405      |      |  |       |     |      |       |       |            | u | x |   |  | <b>F</b>  |  | <b>F</b>         |  |                   |
| 407      |      |  |       |     |      |       | 0.029 | Pt         |   |   |   |  |           |  |                  |  |                   |
| 412      |      |  | 0.023 | 62  | 0.92 | 0.078 | 0.035 | Sb         |   |   |   |  |           |  |                  |  |                   |
| 415      | 0.93 |  |       | 105 |      |       |       |            |   |   |   |  |           |  |                  |  | Bats              |
| 416      |      |  |       |     |      |       | 0.041 | R, wM      |   |   |   |  |           |  |                  |  | Mammals           |
| 417      |      |  |       | 161 |      |       |       |            |   |   |   |  |           |  |                  |  |                   |
| 418      |      |  |       |     |      |       | 0.000 | Pt, R, wMy |   |   |   |  |           |  |                  |  | Mammals           |
| 419      |      |  |       |     |      | 0.050 | 0.039 | wMy, Ef    |   |   |   |  |           |  |                  |  |                   |
| 420      |      |  | 0.025 | 57  | 0.88 | 0.079 | 0.017 | aN         |   |   |   |  |           |  |                  |  |                   |
| 421      | 0.93 |  |       | 186 | 0.92 |       | 0.023 | Pt, Sb, Vm |   |   |   |  |           |  |                  |  |                   |
| 422      |      |  |       |     |      |       |       |            |   |   | x |  | <b>I</b>  |  | <b>I-V</b>       |  |                   |
| 427      |      |  |       |     |      |       |       |            | a |   |   |  | <b>E</b>  |  | <b>E-V-A-L</b>   |  |                   |
| 429      |      |  |       |     |      |       |       |            |   | x |   |  | <b>R</b>  |  | <b>R</b>         |  |                   |
| 432      |      |  |       |     |      |       |       |            | a |   |   |  | <b>P</b>  |  | <b>P</b>         |  |                   |
| 436      |      |  | 0.066 |     |      |       |       |            |   |   |   |  |           |  |                  |  |                   |
| 439      |      |  |       |     |      |       | 0.002 | aN         |   |   |   |  |           |  |                  |  |                   |
| 441      |      |  |       |     |      |       |       |            |   |   |   |  |           |  |                  |  | Mammals           |
| 443      |      |  | 0.061 |     |      |       |       |            |   |   |   |  |           |  |                  |  |                   |
| 447      |      |  | 0.030 | 51  | 0.91 |       | 0.043 | Pt, R, Vm  |   |   |   |  |           |  |                  |  |                   |
| 459      |      |  |       |     |      |       |       |            |   |   |   |  |           |  |                  |  | Mammals           |
| 466      |      |  |       |     |      |       |       |            |   |   | x |  | <b>N</b>  |  | <b>N</b>         |  |                   |
| 468; 469 |      |  |       |     |      |       |       |            |   |   | x |  | <b>YH</b> |  | <b>YH</b>        |  |                   |
| 470      |      |  |       |     |      |       |       |            |   |   | x |  | <b>F</b>  |  | <b>S-N</b>       |  |                   |
| 471      |      |  |       |     |      |       |       |            |   |   | x |  | <b>T</b>  |  | <b>T</b>         |  |                   |
| 472      |      |  |       |     |      |       |       |            |   |   | x |  | <b>R</b>  |  | <b>K-T-N-H-E</b> |  | Mammals           |
| 473      |      |  |       |     |      |       |       |            |   |   | x |  | <b>P</b>  |  | <b>P-H</b>       |  |                   |
| 474      |      |  |       |     |      |       |       |            |   |   | x |  | <b>L</b>  |  | <b>L</b>         |  |                   |

|         |      |      |       |       |      |       |       |                      |   |   |  |  |    |       |  |  |                |
|---------|------|------|-------|-------|------|-------|-------|----------------------|---|---|--|--|----|-------|--|--|----------------|
| 468     |      |      |       |       |      |       |       |                      |   |   |  |  |    |       |  |  |                |
| 478     |      |      |       |       |      | 0.087 |       |                      |   |   |  |  |    |       |  |  |                |
| 479     |      |      |       |       |      |       |       |                      | u |   |  |  | C  | C     |  |  |                |
| 481     | 0.94 |      | 0.056 | 444   | 0.92 |       |       |                      |   |   |  |  |    |       |  |  | <b>Mammals</b> |
| 491     |      |      |       |       |      |       |       |                      |   | x |  |  | N  | N     |  |  | Primates       |
| 494     |      |      |       |       |      |       |       |                      | u | x |  |  | F  | F     |  |  |                |
| 495     |      |      |       |       |      |       |       |                      | U |   |  |  | F  | F     |  |  |                |
| 498     |      |      |       |       |      |       |       |                      |   |   |  |  |    |       |  |  | Mammals        |
| 506     |      |      |       |       |      |       | 0.002 | R                    |   |   |  |  |    |       |  |  | Bats           |
| 508     |      |      |       |       |      | 0.080 | 0.018 | aY, wMy              |   |   |  |  |    |       |  |  |                |
| 509     |      |      |       |       |      |       |       |                      | u |   |  |  | C  | C     |  |  |                |
| 514     |      |      |       |       |      |       |       |                      | a |   |  |  | A  | S     |  |  |                |
| 516     |      |      |       |       |      |       |       |                      | a |   |  |  | S  | G-D-A |  |  |                |
| 518     |      |      |       |       |      |       |       |                      | a |   |  |  | A  | G-N   |  |  |                |
| 520     |      |      |       |       |      |       |       |                      |   | x |  |  | V  | V-A   |  |  |                |
| 532     |      |      | 0.10  |       |      |       |       |                      |   |   |  |  |    |       |  |  |                |
| 539     |      |      | 0.10  |       |      | 0.081 | 0.038 | Pt, aN, Ef           |   |   |  |  |    |       |  |  |                |
| 541     |      |      |       |       |      |       |       |                      | a |   |  |  | R  | R-K   |  |  |                |
| 543,545 |      |      |       |       |      |       |       |                      |   | x |  |  | DD | DD    |  |  |                |
| 566     |      |      |       |       |      |       |       |                      | a |   |  |  | H  | H     |  |  |                |
| 567,568 |      |      |       |       |      |       |       |                      | u |   |  |  | YF | YF    |  |  |                |
| 573,574 |      |      |       |       |      |       |       |                      |   | x |  |  | VT | VT    |  |  |                |
| 685     |      |      |       |       |      |       | 0.039 | Pt                   |   |   |  |  |    |       |  |  |                |
| 693     |      |      | 0.07  |       |      |       |       |                      |   |   |  |  |    |       |  |  |                |
| 695     |      |      |       | 143   |      |       |       |                      |   |   |  |  |    |       |  |  |                |
| 606     |      |      |       |       |      |       |       |                      |   |   |  |  |    |       |  |  | Mammals        |
| 608     | 0.99 |      |       | 921   | 0.91 | 0.09  |       |                      |   |   |  |  |    |       |  |  |                |
| 620     |      |      |       |       |      |       | 0.001 | <i>N.albiventris</i> |   |   |  |  |    |       |  |  |                |
| 629     |      |      |       |       |      |       |       |                      |   |   |  |  |    |       |  |  | Mammals        |
| 633     |      |      | 0.059 |       |      |       |       |                      |   |   |  |  |    |       |  |  | Mammals        |
| 636     |      |      |       | 76    |      | 0.043 |       |                      |   |   |  |  |    |       |  |  |                |
| 639     |      |      |       |       |      |       |       |                      |   |   |  |  |    |       |  |  | Mammals        |
| 643     |      |      | 0.066 |       |      |       |       |                      |   |   |  |  |    |       |  |  |                |
| 656     |      |      | 0.053 | 50    | 0.89 |       |       |                      |   |   |  |  |    |       |  |  |                |
| 677     | 0.99 | .070 | 0.005 | 13313 | 0.99 |       | 0.006 | aY, Pt, R, Sb, Vm    |   |   |  |  |    |       |  |  | <b>Bats</b>    |

|     |      |  |       |     |      |       |       |                  |  |  |  |  |  |                               |
|-----|------|--|-------|-----|------|-------|-------|------------------|--|--|--|--|--|-------------------------------|
| 685 |      |  | 0.046 | 70  | 0.92 |       | 0.053 | Pt, Sb, wMy      |  |  |  |  |  |                               |
| 686 |      |  | 0.067 |     |      |       |       |                  |  |  |  |  |  |                               |
| 689 | 0.91 |  |       |     |      |       |       |                  |  |  |  |  |  | Bats                          |
| 691 |      |  | 0.044 | 168 | 0.93 |       | 0.019 | R, Sb            |  |  |  |  |  |                               |
| 699 | 0.97 |  |       | 985 |      |       |       |                  |  |  |  |  |  |                               |
| 712 |      |  | 0.069 | 145 | 0.90 | 0.087 | 0.002 | aY, Pt           |  |  |  |  |  | <b>Bats</b><br><b>Mammals</b> |
| 719 |      |  |       |     |      |       | 0.050 | <i>R.euryale</i> |  |  |  |  |  |                               |
| 721 |      |  | 0.086 |     |      |       |       |                  |  |  |  |  |  |                               |
| 723 | 0.96 |  | 0.087 | 216 | 0.93 | 0.001 | 0.002 | wMy, Vm          |  |  |  |  |  |                               |
| 730 |      |  |       |     |      |       | 0.044 | Pt               |  |  |  |  |  |                               |
| 745 |      |  | 0.041 |     |      |       |       |                  |  |  |  |  |  |                               |
| 761 |      |  |       |     |      |       |       |                  |  |  |  |  |  | Mammals                       |
| 666 |      |  |       |     |      |       |       |                  |  |  |  |  |  | Mammals                       |
| 790 |      |  | 0.087 |     |      | 0.001 |       |                  |  |  |  |  |  |                               |
| 805 |      |  | 0.052 |     |      | 0.023 |       |                  |  |  |  |  |  |                               |
| 811 |      |  |       |     |      | 0.021 |       |                  |  |  |  |  |  |                               |
| 911 |      |  |       |     |      | 0.095 |       |                  |  |  |  |  |  |                               |

<sup>a</sup> putatively positive selected sites of bats are coloured according to figure 3.

<sup>b</sup> aY (ancestral lineage of Yinpterochiroptera), R (ancestral lineage of Rhinolophidae), Pt (ancestral lineage of Pteropodidae), aN (ancestral lineage of Noctilionidae), wMy (ancestral lineage within Myotis), Sb (*S. bilineata*), Rhip (*R. hipposideros*), Vm (*V. murinus*), Mb (*M. brandtii*), Ef (*E. fuscus*).

<sup>c</sup> sites involved in Dimerization, u: dimerization of the unliganded dimer, a: dimerization of the activated dimer.

<sup>d</sup> 1. binding site: binding the uridine mononucleosid and small chemical ligands, induced the activated form.

<sup>e</sup> 2. binding site: binding uridine rich ssRNA oligomers, induces binding of uridine at 1. site.

<sup>f</sup> conserved amino acids are in bolt.

<sup>g</sup> positively selected sites in bats (Escalera-Zamudio et al 2015), mammals (Areal et al. 2011), suidae (Darfour-Oduro et al. 2015) and primates (Wasliuk and Nachmann 2010), coincidence with sites of our bat PSS are marked bolt.

## References

- Areal H, Abrantes J, Esteves P.J 2011. Signatures of positive selection in toll-like receptor genes in mammals. *BMC Evol Biol* 11:368.
- Darfour-Oduro KA, Megens HJ, Roca AL, Groenen M, Schook LB (2015) Adaptive Evolution of Toll-like Receptors (TLRs) in the Family Suidae. *PLoS ONE*. 10(4):e0124069.
- Escalera-Zamudio M, Zepeda-Mendoza ML, Loza-Rubio E, Rojas-Anaya E, Mendez-Ojeda ML, Arias CF, Greenwood AD (2015) The evolution of bat nucleic acid-sensing Toll-like receptors. *Molecular Ecology* 24: 5899-5909.
- Tanji H, Ohto U, Shibata T, Miyaka K, Shimizu T (2013) Structural reorganization of the Toll-like receptor 8 dimer induced by agonistic ligands. *Science*. 339:1426-1429.
- Tanji H, Ohto U, Shibata T, Miyaka K, Taoka M, Yamauchi Y, Shimizu T et al (2015) Toll-like receptor 8 sense degradation products of single stranded RNA. *Nat Struct Mol Biol*. 22(2):109-115.
- Wlasiuk G, Nachman MW (2010) Adaptation and Constraint at toll-like receptors in Primates. *Mol Biol Evol*. 27(9):2172-2186.
